# Supplementary material for: Biocompatible Materials Based on Plasticized Poly(lactic acid), Chitosan and Rosemary Ethanolic Extract I. Effect of Chitosan on the Properties of Plasticized Poly(lactic acid) Materials
Source: PubMed Central journal article supplement (PMC6631666; doi:10.3390/polym11060941), 2019-05-30
Supplement: polymers-11-00941-s001.pdf [file polymers-11-00941-s001.pdf]

## Supplementary materials

**Table 10.** The influence of biocomposites administration on the AST, ALT and LDH activity. Values were presented as mean  $\pm$  S.D. for 6 animals in a group.

| Groups           |        | AST (U/mL)      | ALT (U/mL)      | LDH (U/mL)         |
|------------------|--------|-----------------|-----------------|--------------------|
| Control          | 24 hrs | 41.7 $\pm$ 2.72 | 95.3 $\pm$ 4.14 | 342.29 $\pm$ 44.55 |
|                  | 7 days | 42.5 $\pm$ 3.07 | 96.5 $\pm$ 3.89 | 344.33 $\pm$ 41.37 |
| PLA/PEG          | 24 hrs | 43.7 $\pm$ 3.37 | 98.5 $\pm$ 5.46 | 345.72 $\pm$ 44.37 |
|                  | 7 days | 44.8 $\pm$ 3.89 | 98.8 $\pm$ 4.33 | 349.15 $\pm$ 40.46 |
| PLA/PEG/3CS      | 24 hrs | 41.8 $\pm$ 2.89 | 95.5 $\pm$ 5.14 | 344.68 $\pm$ 41.33 |
|                  | 7 days | 42.5 $\pm$ 3.37 | 96.4 $\pm$ 5.55 | 346.22 $\pm$ 43.72 |
| PLA/PEG/6CS      | 24 hrs | 41.3 $\pm$ 2.64 | 96.1 $\pm$ 5.46 | 344.75 $\pm$ 42.55 |
|                  | 7 days | 43.8 $\pm$ 3.33 | 96.7 $\pm$ 5.25 | 347.67 $\pm$ 44.37 |
| PLA/PEG/0.5R     | 24 hrs | 43.5 $\pm$ 3.14 | 97.2 $\pm$ 3.89 | 345.45 $\pm$ 39.89 |
|                  | 7 days | 44.6 $\pm$ 3.64 | 98.6 $\pm$ 5.72 | 347.83 $\pm$ 42.27 |
| PLA/PEG/3CS/0.5R | 24 hrs | 42.4 $\pm$ 3.46 | 97.2 $\pm$ 5.89 | 345.29 $\pm$ 42.64 |
|                  | 7 days | 43.9 $\pm$ 3.14 | 97.9 $\pm$ 6.05 | 347.43 $\pm$ 40.89 |
| PLA/PEG/6CS/0.5R | 24 hrs | 42.7 $\pm$ 3.72 | 97.4 $\pm$ 5.33 | 345.52 $\pm$ 44.55 |
|                  | 7 days | 43.9 $\pm$ 3.55 | 98.7 $\pm$ 6.14 | 348.83 $\pm$ 43.46 |

**Table 11.** The influence of biocomposites administration on the serum urea and creatinine concentration. Values were presented as mean  $\pm$  S.D. for 6 rats in a group.

| Groups            |        | urea (mg/dL)    | creatinine (mg/dL) |
|-------------------|--------|-----------------|--------------------|
| Control           | 24 hrs | 37.2 $\pm$ 3.37 | < 0.1              |
|                   | 7 days | 37.9 $\pm$ 4.55 | < 0.1              |
| PLA/PEG           | 24 hrs | 38.8 $\pm$ 3.55 | < 0.2              |
|                   | 7 days | 39.6 $\pm$ 3.27 | < 0.2              |
| PLA/PEG/3CS       | 24 hrs | 37.4 $\pm$ 3.89 | < 0.2              |
|                   | 7 days | 38.2 $\pm$ 4.64 | < 0.1              |
| PLA/PEG/6CS       | 24 hrs | 37.6 $\pm$ 4.33 | < 0.1              |
|                   | 7 days | 39.1 $\pm$ 4.46 | < 0.2              |
| PLA/PEG/0.5 R     | 24 hrs | 39.2 $\pm$ 4.64 | < 0.2              |
|                   | 7 days | 39.5 $\pm$ 3.37 | < 0.2              |
| PLA/PEG/3CS/0.5 R | 24 hrs | 39.3 $\pm$ 5.14 | < 0.1              |
|                   | 7 days | 39.8 $\pm$ 5.37 | < 0.2              |
| PLA/PEG/6CS/0.5 R | 24 hrs | 38.1 $\pm$ 4.27 | < 0.2              |
|                   | 7 days | 39.5 $\pm$ 5.55 | < 0.2              |

**Table 12.** The influence of biocomposites administration on the serum complement level and the NBT test.

| Groups  |        | Complement       | NBT test         |
|---------|--------|------------------|------------------|
| Control | 24 hrs | 16.33 $\pm$ 1.55 | 53.73 $\pm$ 3.46 |

|                         |               |            |            |
|-------------------------|---------------|------------|------------|
|                         | <b>7 days</b> | 16.48±1.37 | 53.65±3.55 |
| <b>PLA/PEG</b>          | <b>24 hrs</b> | 17.07±0.89 | 53.85±4.05 |
|                         | <b>7 days</b> | 16.63±1.55 | 53.37±3.64 |
| <b>PLA/PEG/3CS</b>      | <b>24 hrs</b> | 16.29±1.72 | 53.85±3.89 |
|                         | <b>7 days</b> | 16.73±1.33 | 53.45±3.72 |
| <b>PLA/PEG/6CS</b>      | <b>24 hrs</b> | 16.85±1.55 | 53.25±3.64 |
|                         | <b>7 days</b> | 16.69±1.33 | 54.43±3.89 |
| <b>PLA/PEG/0.5R</b>     | <b>24 hrs</b> | 17.03±0.83 | 54.19±4.17 |
|                         | <b>7 days</b> | 17.13±1.46 | 53.49±3.55 |
| <b>PLA/PEG/3CS/0.5R</b> | <b>24 hrs</b> | 17.22±2.04 | 54.39±4.14 |
|                         | <b>7 days</b> | 17.13±1.89 | 55.46±4.37 |
| <b>PLA/PEG/6CS/0.5R</b> | <b>24 hrs</b> | 17.19±1.37 | 55.74±4.33 |
|                         | <b>7 days</b> | 17.33±1.46 | 55.48±3.55 |
